# Supplementary material for: EGFR Protein Expression in KRAS Wild-Type Metastatic Colorectal Cancer Is Another Negative Predictive Factor of the Cetuximab Therapy
Source: PubMed Central journal article supplement (PMC7139947; doi:10.3390/cancers12030614), 2020-03-06
Supplement: cancers-12-00614-s001.pdf [file cancers-12-00614-s001.pdf]

**Supplementary Table.1** PFS and OS results by EGFR expression in the primary and metastatic tumors.

| <b>Primary tumor (N=88)</b> |                           |            |                 |            |                |                |            |                |
|-----------------------------|---------------------------|------------|-----------------|------------|----------------|----------------|------------|----------------|
| <b>HS-Treshold</b>          | <b>No of patients (N)</b> |            | <b>PFS(day)</b> |            | <b>P value</b> | <b>OS(day)</b> |            | <b>P value</b> |
|                             | <b>high</b>               | <b>low</b> | <b>high</b>     | <b>low</b> |                | <b>high</b>    | <b>low</b> |                |
| 0                           | 83                        | 5          | 138             | 231        | 0.453          | 418            | 423        | 0.492          |
| 50                          | 65                        | 23         | 130             | 258        | 0.268          | 382            | 512        | 0.201          |
| 100                         | 40                        | 48         | 98              | 258        | 0.131          | 362            | 464        | 0.355          |
| 200                         | 6                         | 82         | 97              | 147        | 0.112          | 67             | 452        | 0.042          |
| <b>Metastasis (N=29)</b>    |                           |            |                 |            |                |                |            |                |
| <b>HS-Treshold</b>          | <b>No of patients (N)</b> |            | <b>PFS(day)</b> |            | <b>P value</b> | <b>OS(day)</b> |            | <b>P value</b> |
|                             | <b>high</b>               | <b>low</b> | <b>high</b>     | <b>low</b> |                | <b>high</b>    | <b>low</b> |                |
| 0                           | 26                        | 3          | 115             | 430        | 0.067          | 354            | NR         | 0.008          |
| 50                          | 20                        | 9          | 119             | 289        | 0.024          | 333            | 752        | 0.005          |
| 100                         | 13                        | 16         | 118             | 203        | 0.143          | 333            | 579        | 0.018          |
| 200                         | 5                         | 24         | 30              | 203        | 0.046          | 201            | 518        | 0.053          |

NR= not reached
